# Supplementary material for: Effect of modified corn stalk combined with ultrasonic conditioning on sludge dewatering performance
Source: Royal Society of Chemistry journal article supplement (doi:10.1039/d5ra01085c), 2025-01-01
Supplement: d5ra01085c1.pdf [file d5ra01085c1.pdf]

1      **Effect of modified corn stalk combined with ultrasonic conditioning on sludge**  
2                      **dewatering performance**

3 Feng Lin<sup>a</sup>, Siqi Zhang<sup>a</sup>, Jing Ma<sup>b1</sup>, Shuxin Zhang<sup>a</sup>, Baoyu Wang<sup>a</sup>, Huanlei Yang<sup>a</sup>

4 <sup>a</sup> School of Chemical Engineering and Technology, Guangdong Industry Polytechnic  
5 University, Guangzhou, China

6 <sup>b</sup>Automotive Engineering Department, Jining Polytechnic, Jining, China

<sup>1</sup> Corresponding author at: Automotive Engineering Department, Jining Polytechnic, Jining, China

E-mail address: 15603052358@163.com (J. Ma)

## 7        **Text S1**

8        The plant employs the deep-water type improved A<sup>2</sup>/O + rectangular treatment  
9        process. The sludge was concentrated to 94.50%-95% through gravity sedimentation,  
10       then stored in a refrigerator at 4°C for later use. Before usage, the sludge was  
11       thoroughly mixed and brought to room temperature. The wastewater treatment plant  
12       employs an enhanced A<sup>2</sup>/O+ rectangular treatment process, with a hydraulic retention  
13       time (HRT) ranging from 8 to 12 hours and a sludge retention time (SRT) between 15  
14       and 30 days. The effluent chemical oxygen demand (COD) concentration is  
15       maintained at 7–20 mg/L, with a removal rate of approximately over 90%. The  
16       effluent ammonia-nitrogen concentration is kept at 0.10–0.50 mg/L, achieving a  
17       removal rate of over 95%. The total nitrogen (TN) removal rate is around 70%–80%,  
18       while the total phosphorus (TP) concentration is relatively low, with a removal rate of  
19       approximately 60%–70%.

20       A 100 mL of sludge was poured into a 250 mL beaker, and a certain amount of  
21       MCSP was added at room temperature. The mixture was initially agitated at 150 rpm  
22       for 30 s, followed by stirring at 50 rpm for 2 min. Subsequently, the conditioned  
23       sludge was allowed to stand in the beaker for 10 min. Each test was conducted in  
24       triplicate.

25       One hundred milliliters of sludge was placed into a 250 mL beaker and subjected  
26       to ultrasonication at a frequency of 20 kHz and power intensity of 100 W for 10 min.  
27       Afterward, the dewatering agent MCSP was added to the sludge sample. The mixture

28 was initially agitated at 150 rpm for 30 s, followed by stirring at 50 rpm for 2 min.  
29 Subsequently, the conditioned sludge was allowed to stand in the beaker for 10 min.  
30 Each test was conducted in triplicate.

31

## 32 **Text S2**

33 In this study, the sludge dewatering performance was evaluated by measuring the  
34 water content of the dewatered sludge. The pressure applied during filtration was set  
35 at 5-6.0 MPa, and the filtration time was fixed at 5 min. The water content of the  
36 dewatered sludge was determined using a moisture analyzer (HX204, Mettler  
37 Toledo).

38 The specific resistance to filtration (SRF) of sludge represents the resistance per  
39 unit filtration area encountered by unit mass of sludge during filtration under a  
40 constant pressure. It stands as a pivotal indicator for assessing the filtration  
41 performance of sludge. Utilizing a Buchner funnel with an inner diameter of 7 cm, a  
42 sludge sample of 100 mL was subjected to suction filtration through rapid qualitative  
43 filter paper while maintaining a pressure of 0.05 MPa. The volumes of filtrate at  
44 corresponding time intervals were recorded and utilized to compute the SRF, with the  
45 calculation formula presented as follows:

46

$$47 \quad r = \frac{2bPA^2}{\mu C}$$

48

49 where

50  $r$  - Specific resistance to filtration of sludge, in meters per kilogram ( $\text{m}\cdot\text{kg}^{-1}$ );

51  $b$  - The slope of the filtration equation  $t/V = b\cdot V + a$ , in seconds per meter to the  
52 power of negative six ( $\text{s}\cdot\text{m}^{-6}$ );

53  $P$  - Pressure, in megapascals (MPa) or newtons per meter squared ( $\text{N}\cdot\text{m}^{-2}$ );

54  $A$  - Filtration area, in meters squared ( $\text{m}^2$ );

55  $\mu$  - Viscosity of the filtrate, in newtons per second per meter squared ( $\text{N}\cdot\text{s}\cdot\text{m}^{-2}$ );

56  $C$  - Mass of dry sludge retained by the filter paper per unit volume of filtrate, in  
57 kilograms per meter cubed ( $\text{kg}\cdot\text{m}^{-3}$ ).

58 The bound water content of sludge flocs was determined using Differential  
59 Scanning Calorimetry (DSC). A certain amount of sludge precipitate, obtained after  
60 centrifuging at 1800 r/min for 5 minutes, was placed in a Differential Scanning  
61 Calorimeter (DSC 214, NETZSCH). The sample was cooled from room temperature  
62 to  $-25^{\circ}\text{C}$  at a rate of  $-2^{\circ}\text{C}/\text{min}$  and then heated back to  $20^{\circ}\text{C}$  at the same rate. The  
63 enthalpy change ( $\Delta H$ ) of the exothermic peak was obtained from the differential  
64 thermal curve, which was calibrated using ultrapure water of known mass. The  
65 calculation formula is as follows:

66

67  $WB = WT - \Delta H/\Delta H_0$

68 where

69 WB - Bound water content (g/g DS);

70 WT - Total water content in the sludge cake (g/g DS);

71  $\Delta H$  - Enthalpy change during the endothermic process of the sludge cake (J/g);

72  $\Delta H_0$  - Enthalpy change during the endothermic process of ultrapure water (J/g).

73

74

75

### 76 **Text S3**

77 Initially, 45 mL of sludge was centrifuged at 4000 g for 5 min in a 50 mL  
78 centrifuge tube, and the supernatant obtained after filtration through a 0.45  $\mu\text{m}$   
79 membrane was designated as soluble EPS (S-EPS). The remaining precipitate was  
80 resuspended using 0.05% NaCl preheated to 65 °C to a volume of 45 mL, vortexed,  
81 and centrifuged again at 4000 g for 10 min. The supernatant obtained after filtration  
82 through a 0.45  $\mu\text{m}$  membrane was designated as loosely bound EPS (LB-EPS).  
83 Subsequently, 0.05% NaCl at 65 °C was added to the precipitate to a volume of 45  
84 mL, resuspended using a vortex mixer, heated in a water bath for 30 min, and  
85 centrifuged at 4000 g for 15 min. The supernatant obtained after filtration through a  
86 0.45  $\mu\text{m}$  membrane was designated as tightly bound EPS (TB-EPS).

87

### 88 **Text S4**

89 **Image processing includes the following steps:**

90       **Image Acquisition:** Microscopy was employed to capture images of sludge flocs.

91       **Background Processing:** The influence of background brightness, noise, and  
92 impurities during image capture was eliminated.

93       **Image Segmentation:** A thresholding technique was applied to convert the  
94 images into binary images. Based on the grayscale distribution characteristics of the  
95 captured images, the grayscale threshold range was adjusted to separate the flocs from  
96 the background.

97       **Feature Extraction:** Intrinsic parameter data of the measurement software, such  
98 as floc area, perimeter, and circularity, were utilized.

99       **Data Analysis:** The calculated results of the intrinsic parameters from the  
100 software were exported to an Excel file, where the values of the exported parameters  
101 were further computed.

102       The sludge floc was placed under a stereo microscope, and several images of the  
103 floc were captured. The captured images were processed using Image Pro Plus 6.0  
104 software to calculate the projection area (A), perimeter (P), and major axis length  
105 (La). Based on the relationships  $P \propto LaD_1$  and  $A \propto PD_2$ , the one-dimensional fractal  
106 dimension ( $D_1$ ) and two-dimensional fractal dimension ( $D_2$ ) were obtained.

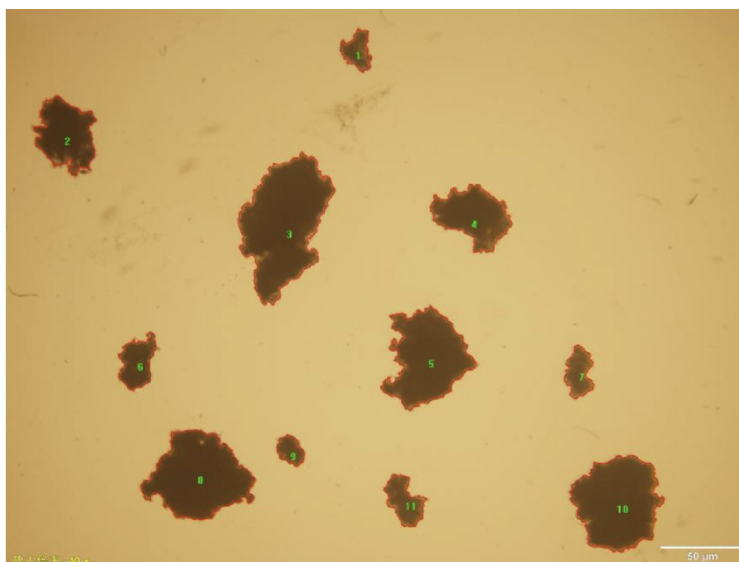

## Text S5

In the 1500-1800  $\text{cm}^{-1}$  region, the FTIR spectra of CSP and MCSP show significant differences. For CSP, the absorption peak at 1514  $\text{cm}^{-1}$  corresponds to the C=C stretching vibration of aromatic rings, indicating the presence of aromatic compounds in CSP. The peak at 1730  $\text{cm}^{-1}$  is attributed to the C=O stretching vibration, which may originate from ester or carbonyl compounds. After modification, the etherification reaction introduces ether bonds (C-O-C) and alkyl chains ( $-\text{CH}_2-$ ), altering the molecular structure of CSP. As a result, a new peak appears at 1625.7  $\text{cm}^{-1}$  in the FTIR spectrum of MCSP, primarily due to the introduction of amide or carboxyl groups by the etherification reaction, which manifests as a C=O stretching vibration peak at 1625.7  $\text{cm}^{-1}$ . The etherification reaction likely increases the content of aliphatic compounds, evidenced by the C-H bending vibration peak at 1401  $\text{cm}^{-1}$  in the FTIR spectrum. Additionally, the introduction of more ether bonds and alcoholic functional groups by the etherification reaction is indicated by the C-O stretching vibration peak at 1035.5  $\text{cm}^{-1}$ . This further confirms that the etherification reaction

introduces quaternary ammonium groups, enhancing the cationic properties and surface charge distribution of cellulose, rendering MCSP positively charged. Thus, the addition of MCSP can facilitate electrostatic neutralization, which helps to adsorb and aggregate colloidal particles in the sludge system, thereby improving sludge dewatering performance.

## **Text S6**

### **Influence of preparation conditions on sludge dewatering performance**

Through single-factor experiments, the effects of alkali concentration, alkalization time, etherification temperature, etherification time, and etherification agent concentration during the preparation of MCSP on sludge dewatering performance were investigated. As shown in Fig. S3, with the increase in alkali concentration, both the SRF and the water content of the dewatered sludge initially decreased and then increased. When the alkalization concentration was 8%, the SRF and water content of the dewatered sludge decreased to  $5.36 \times 10^{12} \text{ m} \cdot \text{kg}^{-1}$  and 62.32%, respectively. However, when the alkalization concentration increased to 20%, the SRF and water content of the dewatered sludge rose to  $7.45 \times 10^{12} \text{ m} \cdot \text{kg}^{-1}$  and 66.31%, respectively. In the optimization experiment for alkalization time, when the alkalization time was 0.5 h, the SRF and water content of the dewatered sludge were  $5.22 \times 10^{12} \text{ m} \cdot \text{kg}^{-1}$  and 65.01%, respectively. Similarly, as the alkalization time increased, the SRF and water content of the dewatered sludge also showed an



144 increasing trend. This indicates that alkalization conditions have a significant impact  
145 on the properties of MCSP, which in turn plays a crucial role in sludge conditioning.  
146 This is because during the alkalization process, sodium ions and hydroxyl ions that  
147 are paired apart from hydrated ions (Choo et al., 2023). At lower alkali  
148 concentrations, these hydrated ions bind a large number of water molecules, resulting  
149 in excessive size that prevents them from effectively destroying the crystalline  
150 structure within the fiber crystal region. As the NaOH concentration increases, the  
151 number of water molecules that can form hydrated ions in the liquid phase decreases,  
152 thereby reducing the size of these hydrated ions and allowing them to penetrate into  
153 the fiber crystal region to participate in reactions. However, when the alkali  
154 concentration further increases, the size of these hydrated ions decreases further,  
155 reducing the efficiency of crystal region destruction, and the number of sodium ions  
156 contained therein also increases, competing with bound water, leading to a decrease in  
157 the swelling degree of the fiber structure (Feng et al., 2024).

158 During the etherification reaction, as the etherification temperature increased, the  
159 SRF and the water content of the dewatered sludge initially increased and then  
160 decreased. At an etherification temperature of 60°C, the SRF and water content  
161 reached their lowest values, which were  $5.54 \times 10^{12} \text{ m} \cdot \text{kg}^{-1}$  and 63.35%, respectively.  
162 Additionally, similar trends were observed for the effects of etherification time and  
163 etherification agent concentration on sludge dewatering. This is primarily due to the  
164 etherification treatment of corn stalk using the CTMAB, which results in the modified  
165 product surface carrying positive charges. These positive charges can neutralize the

negative charges contained in the sludge, disrupting the stable state of the sludge system and facilitating subsequent mechanical removal of water, thereby improving sludge dewatering performance. However, when the etherification concentration, temperature, and time are excessive, leading to an excessive number of positive charges on the surface of the modified product, an excessive number of positive charges in the system can reform a stable system with opposite charges, which is unfavorable for the occurrence of repolymerization reactions, thereby deteriorating sludge dewatering performance.

#### **Optimization of preparation conditions using response surface methodology**

Based on the optimal value ranges of factors A (alkali concentration), B (alkalization time), C (etherification temperature), and E (etherification concentration) determined through single-factor experiments, the water content of the dewatered sludge was selected as the response variable (R1). Utilizing the Box-Behnken design of the response surface methodology (RSM) for a 5-factor, 3-level experimental scheme, a total of 46 experimental trials were conducted.

As shown in Table S2 and Fig. S4, variance analysis and interaction analysis were conducted on the regression equation for the moisture content of the sludge cake after press filtration. The P-value indicates the significance within the model equation. A regression "Prob > F" value and its corresponding value less than 0.0500 signify a significant model term, whereas a value greater than 0.1000 indicates the opposite (Liu et al., 2010). The quadratic model exhibited an F-value of 182.61 and a P-value <

0.0001, indicating a highly significant quadratic polynomial regression model. Analysis of lack of fit for the quadratic polynomial revealed a "Lack of Fit" F-value of 1.65, which is greater than 0.05, suggesting that the model's lack of fit is not significant, which is beneficial for the model. The multiple correlation coefficient ( $R^2$ ) for the quadratic model was 0.98, indicating that 98% of the data variability in this RSM statistical analysis can be explained by the model. Furthermore, the significance test of the quadratic polynomial regression equation revealed that the primary terms, including A (alkali concentration), B (alkalization time), C (etherification temperature), and E (etherification concentration), had significant effects on the sludge dewatering performance. The interaction terms AB, AE, BC, BD, and CE also significantly influenced the response value. Among the quadratic terms,  $A^2$ ,  $B^2$ ,  $C^2$ ,  $D^2$ , and  $E^2$  had extremely significant effects on the response value (Liu et al., 2010).

Additionally, based on the experimental results and the mathematical analysis of the quadratic regression model, the optimal preparation parameters for MCSP were determined as follows: A - alkali concentration of 10%, B - alkalization time of 1.083 h, C - etherification temperature of 60°C, D - etherification time of 2.083 h, and E - etherification concentration of 50%. After five experiments, the water content of the dewatered sludge was  $54.3 \pm 2\%$ , which was close to the theoretically predicted value. This demonstrates that the use of the BBD method to optimize the preparation conditions of MCSP can accurately fit the relationship between the response value and the influencing factors, exhibiting high reliability.

**Text S7**

209        Due to the high crystallinity of cellulose in corn straw, an alkaline pretreatment  
210 is conducted prior to the etherification reaction. This process loosens the bonds  
211 between the components of the raw material, increases the amorphous regions, and  
212 enlarges the contact area between the reagents and the hydroxyl groups of cellulose in  
213 the raw material, thereby enhancing the reactivity of cellulose in corn straw.  
214 Subsequently, cetyltrimethylammonium bromide (CTMAB) is used for the  
215 etherification treatment to introduce quaternary ammonium groups, endowing the  
216 modified product with a positively charged surface.

217

218

219

**Table S1** Characteristics of the activated sludge

| Parameter                                              | Value       |
|--------------------------------------------------------|-------------|
| Water content (%)                                      | 95±0.30     |
| SRF ( $\times 10^{12} \text{m} \cdot \text{kg}^{-1}$ ) | 9.35±0.3    |
| Dv[50] ( $\mu\text{m}$ )                               | 43.5±0.81   |
| Zeta potential (mV)                                    | -16.30±1.10 |
| D1                                                     | 1.23        |
| D2                                                     | 1.12        |
| Bound water content (g/g DS)                           | 8.53        |
| pH                                                     | 6.60±0.20   |
| VSS (g/L)                                              | 4.3 ± 0.12  |

220

221

**Table S2** Response surface model analysis

| Source                     | Sum of squares | df | Mean squares | F-value | P-value  |             |
|----------------------------|----------------|----|--------------|---------|----------|-------------|
| Model                      | 240.44         | 20 | 12.02        | 182.61  | < 0.0001 | significant |
| A-Alkali<br>concentratio   | 5.49           | 1  | 5.49         | 83.33   | < 0.0001 |             |
| B-Alkali<br>treatment time | 13.58          | 1  | 13.58        | 206.24  | < 0.0001 |             |

---

|                  |        |   |        |        |          |
|------------------|--------|---|--------|--------|----------|
| C-               |        |   |        |        |          |
| Etherification   | 7.80   | 1 | 7.80   | 118.45 | < 0.0001 |
| temperature      |        |   |        |        |          |
| D-               |        |   |        |        |          |
| Etherification   | 0.5406 | 1 | 0.5406 | 8.21   | 0.0083   |
| time             |        |   |        |        |          |
| E-Etherification |        |   |        |        |          |
| concentration    | 32.66  | 1 | 32.66  | 496.08 | < 0.0001 |
| AB               | 0.9025 | 1 | 0.9025 | 13.71  | 0.0011   |
| AC               | 0.2070 | 1 | 0.2070 | 3.14   | 0.0884   |
| AD               | 0.0009 | 1 | 0.0009 | 0.0132 | 0.9094   |
| AE               | 1.06   | 1 | 1.06   | 16.12  | 0.0005   |
| BC               | 6.73   | 1 | 6.73   | 102.29 | < 0.0001 |
| BD               | 8.73   | 1 | 8.73   | 132.64 | < 0.0001 |
| BE               | 0.0439 | 1 | 0.0439 | 0.6667 | 0.4219   |
| CD               | 0.0000 | 1 | 0.0000 | 0.0000 | 1.0000   |
| CE               | 0.6806 | 1 | 0.6806 | 10.34  | 0.0036   |
| DE               | 0.0056 | 1 | 0.0056 | 0.0854 | 0.7725   |
| A <sup>2</sup>   | 25.80  | 1 | 25.80  | 391.92 | < 0.0001 |
| B <sup>2</sup>   | 19.86  | 1 | 19.86  | 301.70 | < 0.0001 |
| C <sup>2</sup>   | 34.60  | 1 | 34.60  | 525.51 | < 0.0001 |
| D <sup>2</sup>   | 24.06  | 1 | 24.06  | 365.41 | < 0.0001 |

---

---

|                |        |    |        |         |          |
|----------------|--------|----|--------|---------|----------|
| E <sup>2</sup> | 152.87 | 1  | 152.87 | 2322.10 | < 0.0001 |
| Residual       | 1.65   | 25 | 0.0658 |         |          |
| Lack of Fit    | 1.65   | 20 | 0.0823 |         |          |
| Pure Error     | 0.0000 | 5  | 0.0000 |         |          |
| Cor Total      | 242.08 | 45 |        |         |          |

---

222

223

224

**Table S3 Pearson correlation coefficient**

|        | WC | SPN    | SPS     | LBPN    | LBPS    | TBPN    | TBPS    | Dv[50]  | ZP      | D1       | D2      | BC       |
|--------|----|--------|---------|---------|---------|---------|---------|---------|---------|----------|---------|----------|
| WC     | 1  | -0.660 | -0.641  | -0.674  | -0.652  | -0.737  | -0.741  | -0.903* | -0.890* | 0.690    | -0.836* | 0.921**  |
| SPN    |    | 1      | 0.994** | 0.988** | 0.988** | 0.986** | 0.990** | 0.597   | 0.921** | -0.995** | 0.877*  | -0.900*  |
| SPS    |    |        | 1       | 0.985** | 0.992** | 0.971** | 0.984** | 0.553   | 0.900*  | -0.998** | 0.863*  | -0.886*  |
| LBPN   |    |        |         | 1       | 0.997** | 0.965** | 0.992** | 0.558   | 0.927** | -0.987** | 0.836*  | -0.906*  |
| LBPS   |    |        |         |         | 1       | 0.962** | 0.989** | 0.538   | 0.911*  | -0.991** | 0.841*  | -0.893*  |
| TBPN   |    |        |         |         |         | 1       | 0.986** | 0.717   | 0.955** | -0.981** | 0.939** | -0.936** |
| TBPS   |    |        |         |         |         |         | 1       | 0.653   | 0.960** | -0.992** | 0.898*  | -0.944** |
| Dv[50] |    |        |         |         |         |         |         | 1       | 0.815*  | -0.602   | 0.876*  | -0.825*  |
| ZP     |    |        |         |         |         |         |         |         | 1       | -0.926** | 0.932** | -0.994** |
| D1     |    |        |         |         |         |         |         |         |         | 1        | -0.885* | 0.915*   |
| D2     |    |        |         |         |         |         |         |         |         |          | 1       | -0.932** |
| BC     |    |        |         |         |         |         |         |         |         |          |         | 1        |

225

226

227

228

**Table S4 Characteristic values and cumulative contribution rates**

| Compo<br>nent | Initial eigenvalue |               |                                      | Extract sum of squares and load |               |                 | Rotate the sum of squares to load |               |                 |
|---------------|--------------------|---------------|--------------------------------------|---------------------------------|---------------|-----------------|-----------------------------------|---------------|-----------------|
|               | Eigenvalues        | Variance<br>% | Cumulative<br>contribution<br>rate % | Total                           | Variance<br>% | Accumulate<br>% | Total                             | Variance<br>% | Accumulate<br>% |
|               |                    |               |                                      |                                 |               |                 |                                   |               |                 |
| 1             | 10.02              | 91.12         | 91.12                                | 10.0                            | 91.118        | 91.118          | 7.28                              | 66.21         | 66.21           |



|   |       |       |       |      |       |        |      |       |       |
|---|-------|-------|-------|------|-------|--------|------|-------|-------|
| 2 | 0.83  | 7.56  | 98.68 | 0.83 | 7.564 | 98.682 | 3.55 | 32.30 | 98.51 |
| 3 | 0.11  | 0.998 | 99.68 | 0.11 | 0.998 | 99.680 | 0.13 | 1.17  | 99.68 |
| 4 | 0.025 | 0.23  | 99.91 |      |       |        |      |       |       |

229

230

231

**Table S5 Component matrix**

| Variables | Factor before rotation |        |        | Factor after rotation |        |        |
|-----------|------------------------|--------|--------|-----------------------|--------|--------|
|           | F1                     | F2     | F3     | F1                    | F2     | F3     |
| SPN       | 0.981                  | -0.173 | 0.058  | 0.918                 | 0.390  | -0.017 |
| SPS       | 0.971                  | -0.222 | 0.072  | 0.937                 | 0.345  | -0.032 |
| LBPN      | 0.972                  | -0.216 | -0.076 | 0.930                 | 0.345  | 0.117  |
| LBPS      | 0.969                  | -0.239 | -.022  | 0.942                 | 0.327  | 0.062  |
| TBPN      | 0.993                  | -0.014 | 0.088  | 0.843                 | 0.532  | -0.045 |
| TBPS      | 0.994                  | -0.100 | -0.037 | 0.886                 | 0.456  | 0.079  |
| Dv[50]    | 0.726                  | 0.686  | 0.018  | 0.235                 | 0.971  | 0.019  |
| ZP        | 0.975                  | 0.159  | -0.150 | 0.726                 | 0.660  | 0.194  |
| D1        | -0.984                 | 0.164  | -0.042 | -0.915                | -0.399 | 0.001  |
| D2        | 0.938                  | 0.283  | 0.183  | 0.638                 | 0.754  | -0.139 |
| BC        | -0.964                 | -0.190 | 0.167  | -0.699                | -0.679 | -0.210 |



233

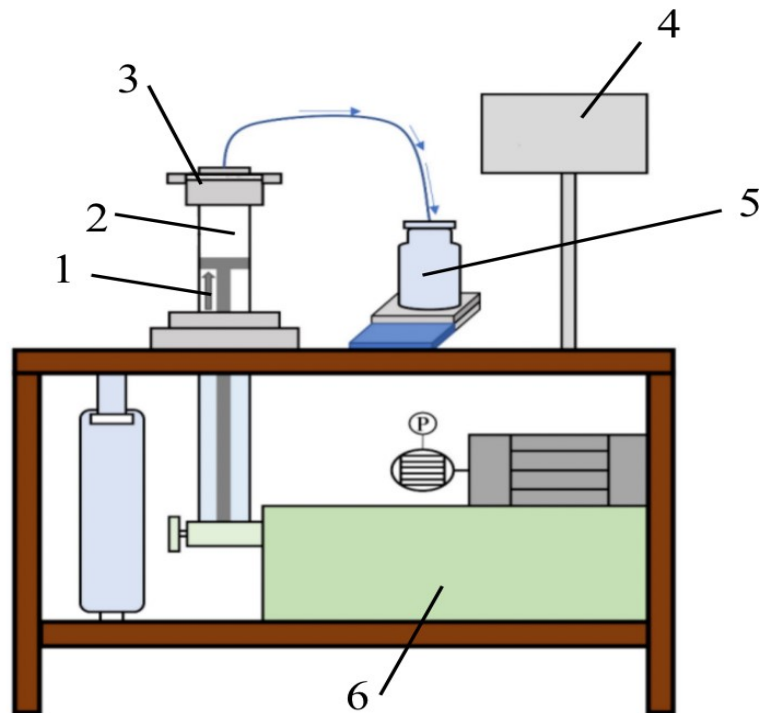

234

235

**Fig. S1 Sludge filter press system**

236 1 Stress direction; 2 press chamber; 3 Filter cloth; 4 The control panel; 5 The filtrate

237 bottle; 6 The hydraulic system

238

239

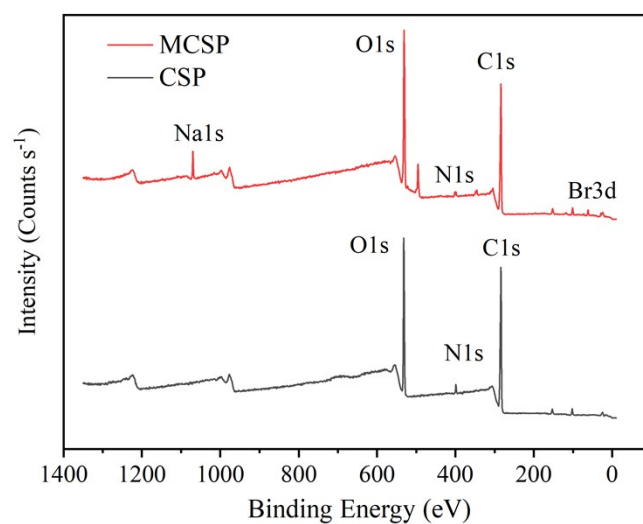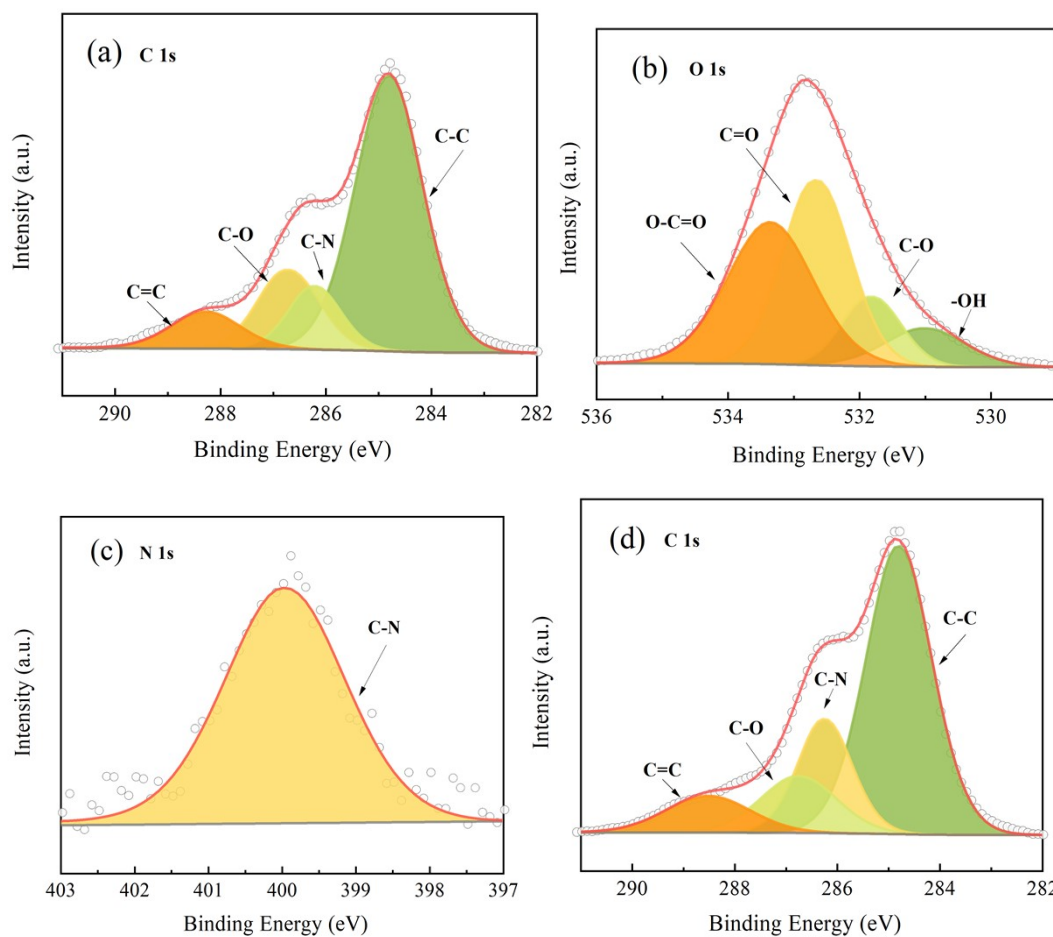

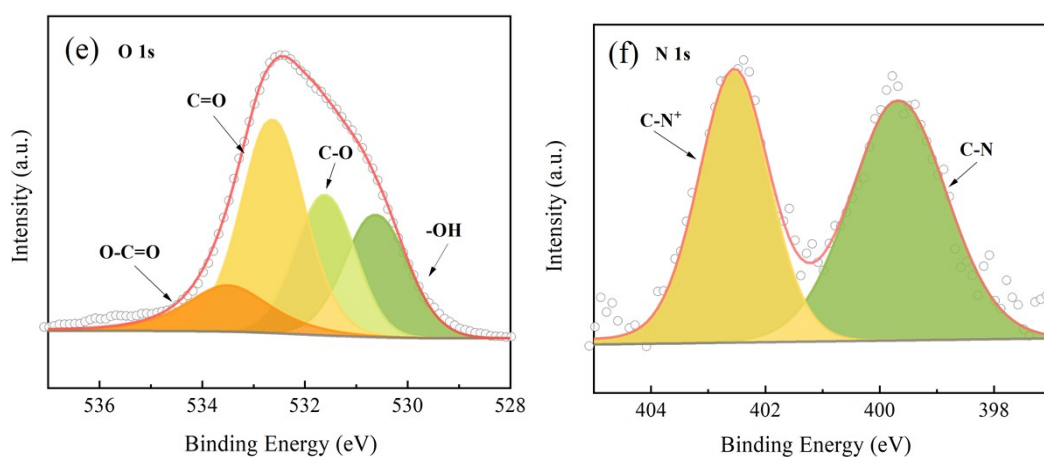

**Fig. S2 XPS-wide scans of the CSP and the MCSP**

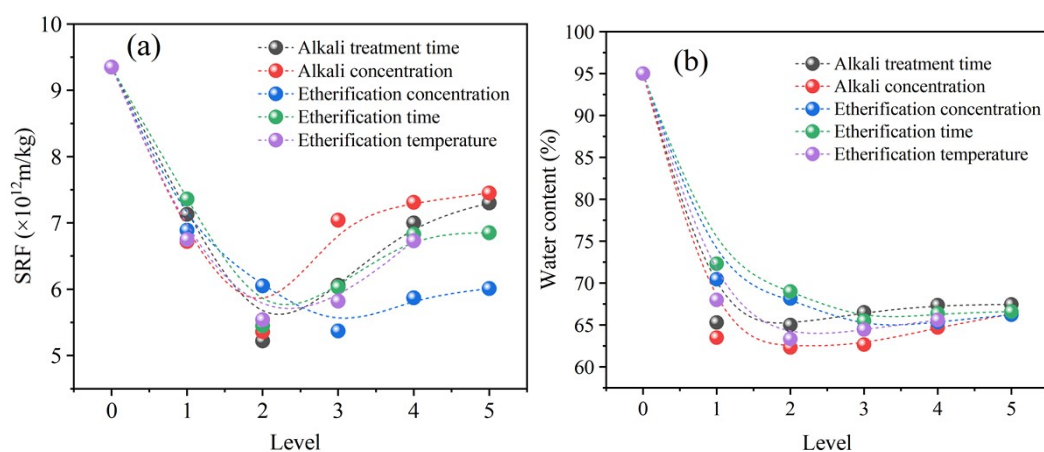

**Fig. S3 Impact of preparation conditions of MCSP on sludge dewatering performance**

(a) Alkali Concentration; (b) Alkalization Time; (c) Etherification Temperature; (d) Etherification Time; (e) Etherification Agent Concentration

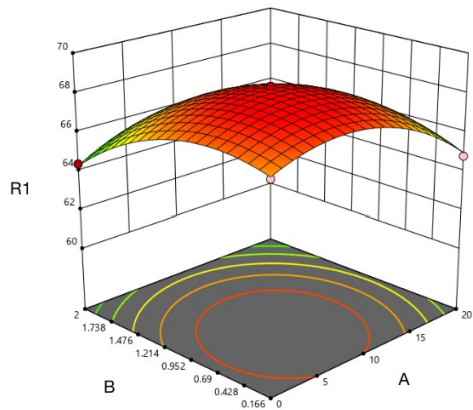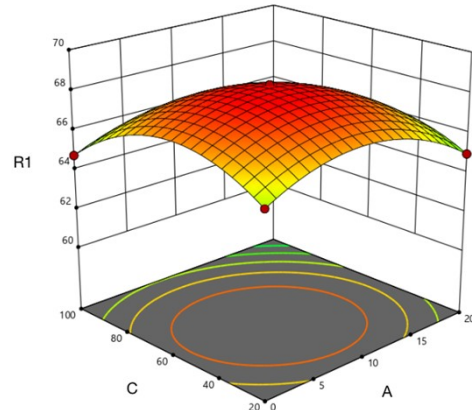

255

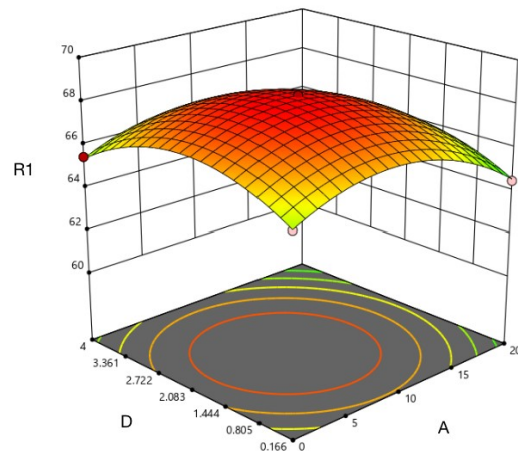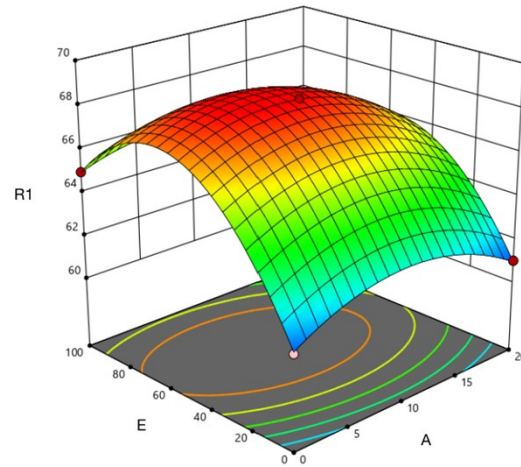

256

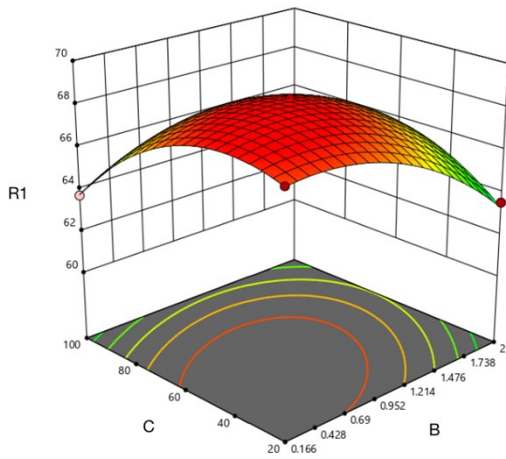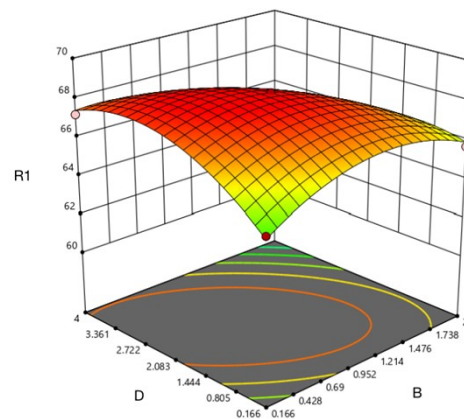

257

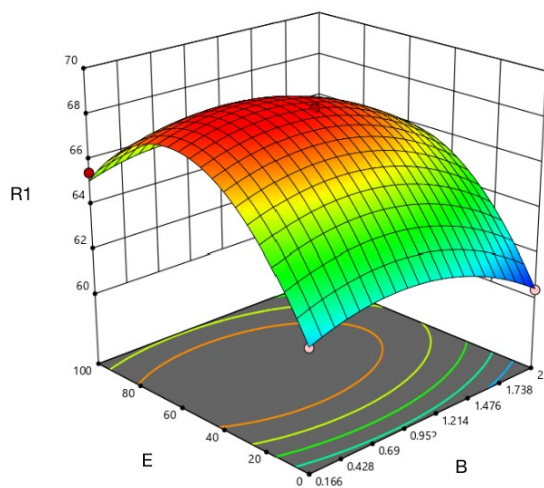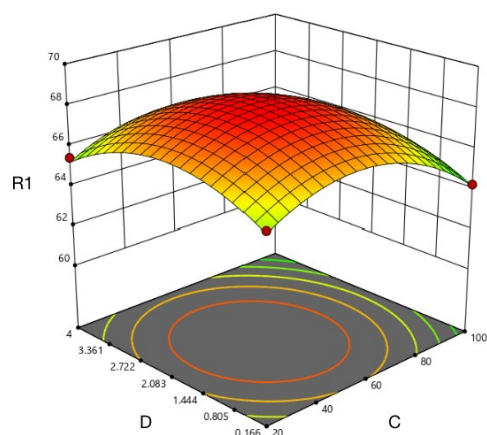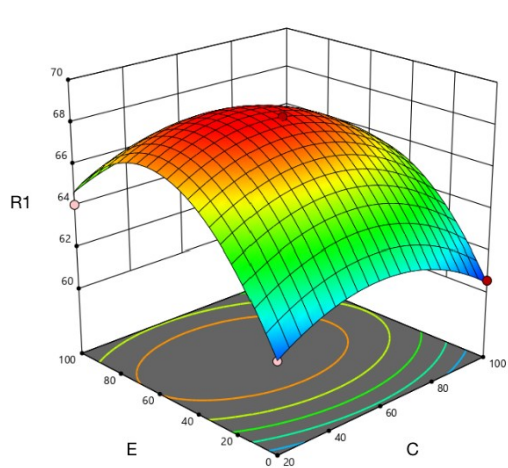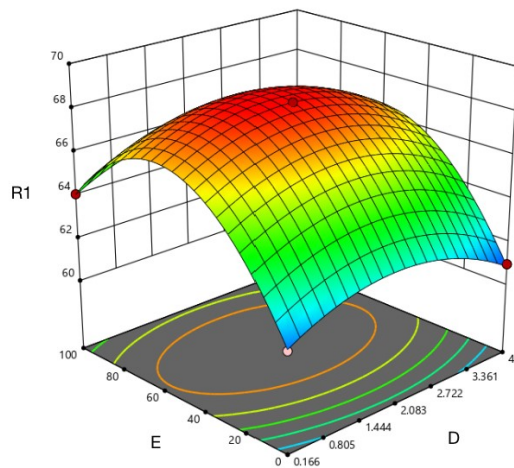

**Fig. S4 Interaction analysis of response surface**

**A-Alkali concentration; B-Alkali treatment time; C-Etherification temperature;  
D-Etherification time; E-Etherification concentration**

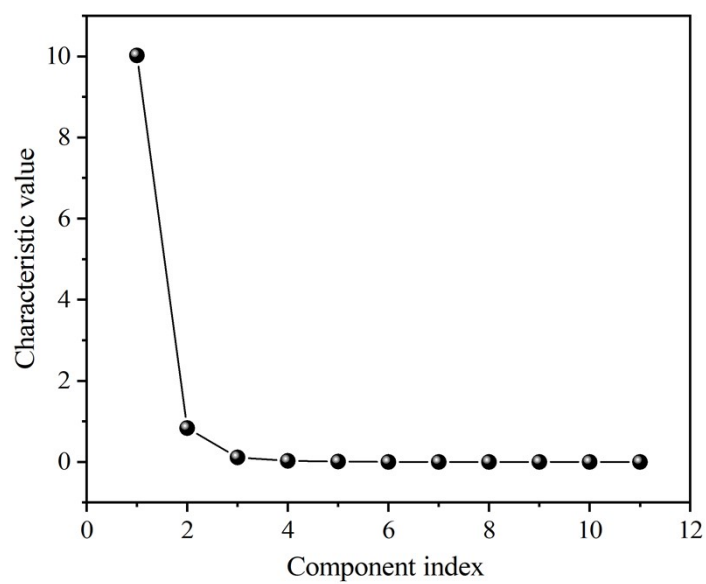

**Fig. S5 Scree plot**

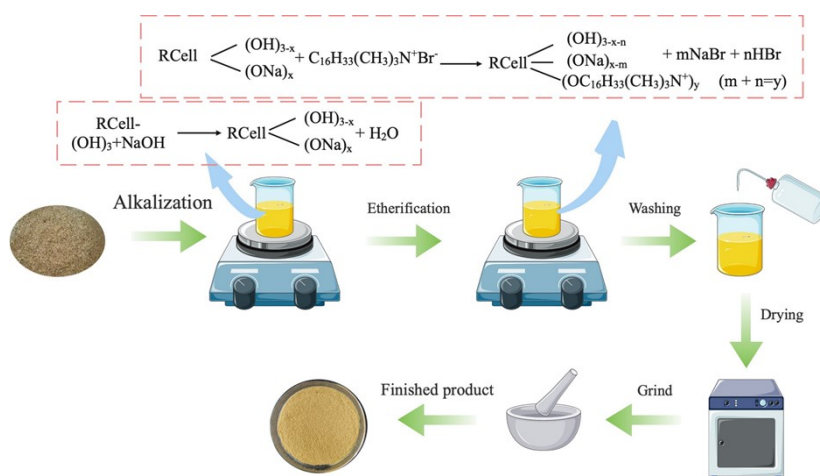

**Fig. S6 Preparation of MCSP**



276

277 Choo T F, Saidin N U, Zali N M, Azhar N (2023) Electrocatalytic and photocatalytic  
278 activities of hierarchically structured zinc oxide nanoparticles derived from  
279 cellulose paper-precipitated hydrozincite. *Ceram Int* 49 39180-39188.  
280 <https://doi.org/10.1016/j.ceramint.2023.09.261>

281 Feng Z, Yang Z, Cao J, Wu Z, Gai E, Wu L (2024) Flocculation of kaolin and anion  
282 dye by cationic cellulose-based flocculant: RSM-optimized synthesis and  
283 experimental study. *J Environ Chem Eng* 12 112309.  
284 <https://doi.org/10.1016/j.jece.2024.112309>

285 Liu Y, Zheng Y, Wang A (2010) Response surface methodology for optimizing  
286 adsorption process parameters for methylene blue removal by a hydrogel  
287 composite. *Adsorp Sci Technol* 28 913-922. [https://doi.org/10.1260/0263-](https://doi.org/10.1260/0263-6174.28.10.913)  
288 [6174.28.10.913](https://doi.org/10.1260/0263-6174.28.10.913)

289
